# Supplementary material for: Measuring Sustainability in Europe: A Min–Max and TOPSIS-Based Evaluation of SDGs Performance
Source: Research Square preprint supplement (doi:10.21203/rs.3.rs-7416080/v1), 2025-09-04
Supplement: Supplementary file 1 [file a6f3e96aba156fa8c0682ab9.docx]

**Measuring Sustainability in Europe: A Min–Max and TOPSIS-Based Evaluation of SDGs Performance**

**Idiano D'Adamo1, Simone Di Leo2, Massimo Gastaldi3,* and Alessandro Paris 4**

1 Department of Computer, Control and Management Engineering, Sapienza University of Rome, Rome, Italy, [idiano.dadamo@uniroma1.it](mailto:idiano.dadamo@uniroma1.it)

2 Department of Computer, Control and Management Engineering, Sapienza University of Rome, Rome, Italy, [dileo@diag.uniroma1.it](mailto:dileo@diag.uniroma1.it)

3 Department of Industrial and Information Engineering and Economics, University of L'Aquila, L'Aquila, Italy, [massimo.gastaldi@univaq.it](mailto:massimo.gastaldi@univaq.it)

4 ESSEC Business School, Cergy, France, [alessandro.paris@essec.edu](mailto:alessandro.paris@essec.edu)

* corresponding author

**SUPPLEMENTARY MATERIAL**

This supplementary material contains ten tables.

Table S1. Input data

|  | **SDG1** |  |  |  |  |  |
| --- | --- | --- | --- | --- | --- | --- |
|  | **People at risk of poverty or social exclusion (sdg_01_10)** | **Housing cost overburden rate by poverty status [SDG_01_50]** | **People at risk of income poverty after social transfers [SDG_01_20]** | **Severe material and social deprivation rate by age group and sex (sdg_01_31)** | **Persons living in households with very low work intensity, by age group (sdg_01_40)** | **In work at-risk-of-poverty rate (sdg_01_41)** |
| **Belgium** | 18.7 | 7.7 | 13.2 | 5.8 | 11.5 | 3.6 |
| **Bulgaria** | 32.2 | 15.1 | 22.9 | 18.7 | 8.6 | 9.7 |
| **Czechia** | 11.8 | 6.9 | 10.2 | 2.1 | 4.5 | 3.4 |
| **Denmark** | 17.1 | 14.7 | 12.4 | 3.2 | 8.8 | 5.9 |
| **Germany** | 21.1 | 11.9 | 14.8 | 6.2 | 9.8 | 7.2 |
| **Estonia** | 25.2 | 4.9 | 22.8 | 3.3 | 5.7 | 10.5 |
| **Ireland** | 19.6 | 3.7 | 13.4 | 5.3 | 9.6 | 5.4 |
| **Greece** | 26.3 | 26.7 | 18.8 | 13.9 | 9.5 | 10.6 |
| **Spain** | 26.0 | 9.2 | 20.4 | 7.7 | 8.7 | 11.7 |
| **France** | 20.7 | 6.5 | 15.6 | 7.0 | 9.9 | 7.5 |
| **Croatia** | 19.9 | 3.8 | 18. | 4.0 | 6.3 | 4.7 |
| **Italy** | 24.4 | 6.6 | 20.1 | 4.5 | 9.8 | 11.5 |
| **Cyprus** | 16.7 | 2.5 | 13.9 | 2.7 | 4.1 | 7.9 |
| **Latvia** | 26. | 5.4 | 22.5 | 7.8 | 7.2 | 9.2 |
| **Lithuania** | 24.6 | 3.5 | 20.9 | 6.0 | 8.3 | 7.6 |
| **Luxembourg** | 19.4 | 15.2 | 17.3 | 2.0 | 3.5 | 12.9 |
| **Hungary** | 18.4 | 8.1 | 12.1 | 9.1 | 6.2 | 7 |
| **Malta** | 20.1 | 2.9 | 16.7 | 4.9 | 3.8 | 7.1 |
| **Netherlands** | 16.5 | 10 | 14.5 | 2.5 | 8.4 | 5 |
| **Austria** | 17.5 | 7.4 | 14.8 | 2.3 | 5.7 | 8.2 |
| **Poland** | 15.9 | 5.6 | 13.7 | 2.8 | 3.8 | 9.1 |
| **Portugal** | 20.1 | 5 | 16.4 | 5.3 | 5.6 | 10.3 |
| **Romania** | 34.4 | 8.5 | 21.2 | 24.3 | 4.2 | 14.5 |
| **Slovenia** | 13.3 | 4.1 | 12.1 | 1.4 | 3.8 | 4.8 |
| **Slovakia** | 16.5 | 2.5 | 13.7 | 6.3 | 3.8 | 7.1 |
| **Finland** | 16.3 | 5.4 | 12.7 | 1.9 | 10.1 | 2.5 |
| **Sweden** | 18.6 | 9.1 | 16. | 2.3 | 8.1 | 7.5 |

|  | **SDG 2** |  |  |  |  |
| --- | --- | --- | --- | --- | --- |
|  | **Agricultural factor income per annual work unit (AWU) (source: Eurostat, DG AGRI) (sdg_02_20)** | **Area under organic farming [SDG_02_40]** | **Obesity rate by body mass index (BMI) (sdg_02_10)** | **Ammonia emissions from agriculture (source: EEA) [SDG_02_60]** | **Government support to agricultural research and development [SDG_02_30] - euro per inhabitant** |
| **Belgium** | 102.80 | 7.60 | 48.9 | 43.8 | 7.60 |
| **Bulgaria** | 225.66 | 2.20 | 53.7 | 11.3 | 2.20 |
| **Czechia** | 125.27 | 15.97 | 56.5 | 19.4 | 15.97 |
| **Denmark** | 179.09 | 11.43 | 54.6 | 24.0 | 11.43 |
| **Germany** | 196.10 | 9.83 | 53.5 | 24.8 | 9.83 |
| **Estonia** | 149.44 | 23.42 | 57.4 | 9.5 | 23.42 |
| **Ireland** | 173.33 | 2.20 | 53.0 | 29.3 | 2.20 |
| **Greece** | 142.79 | 17.22 | 54.9 | 10.8 | 17.22 |
| **Spain** | 98.61 | 10.83 | 51.2 | 16.9 | 10.83 |
| **France** | 126.91 | 9.87 | 46.4 | 16.7 | 9.87 |
| **Croatia** | 175.73 | 8.94 | 58.1 | 17.5 | 8.94 |
| **Italy** | 126.15 | 18.14 | 41.9 | 23.1 | 18.14 |
| **Cyprus** | 114.94 | 6.30 | 47.9 | 61.3 | 6.30 |
| **Latvia** | 172.87 | 15.88 | 60.4 | 6.4 | 15.88 |
| **Lithuania** | 152.34 | 9.32 | 59.4 | 12.3 | 9.32 |
| **Luxembourg** | 146.65 | 6.23 | 49.7 | 41.8 | 6.23 |
| **Hungary** | 135.50 | 6.31 | 58.4 | 15.1 | 6.31 |
| **Malta** | 60.82 | 0.62 | 62.5 | 133.7 | 0.62 |
| **Netherlands** | 96.58 | 4.44 | 48.3 | 58.3 | 4.44 |
| **Austria** | 146.05 | 25.7 | 52.7 | 24.5 | 7 |
| **Poland** | 195.42 | 3.91 | 58.4 | 18.6 | 3.91 |
| **Portugal** | 122.83 | 19.31 | 53.0 | 12.8 | 19.31 |
| **Romania** | 129.13 | 5.08 | 59.7 | 10.6 | 5.08 |
| **Slovenia** | 97.59 | 11.10 | 55.7 | 32.8 | 11.10 |
| **Slovakia** | 168.99 | 13.69 | 58.4 | 11.6 | 13.69 |
| **Finland** | 148.28 | 14.98 | 59.8 | 12.1 | 14.98 |
| **Sweden** | 151.99 | 19.94 | 53.2 | 14.8 | 19.94 |

|  | **SDG 3** |  |  |  |
| --- | --- | --- | --- | --- |
|  | **Share of people with good or very good perceived health by sex [SDG_03_20]** | **Self-reported unmet need for medical examination and care by sex [SDG_03_60]** | **Healthy life years at birth by sex [SDG_03_11]** | **Consumption of antibiotics in the community and hospital sectors – defined daily doses (DDD) per day (sdg_03_70)** |
| **Belgium** | 75.3 | 1 | 63.7 | 20.4 |
| **Bulgaria** | 68.2 | 1 | 66.7 | 25.7 |
| **Czechia** | 68. | 0.2 | 61.8 | 17.1 |
| **Denmark** | 63. | 2.1 | 55.9 | 15.2 |
| **Germany** | 64.2 | 0.3 | 61.1 | 19 |
| **Estonia** | 57.8 | 9.1 | 59.3 | 12.4 |
| **Ireland** | 80.8 | 2.7 | 66 | 23.1 |
| **Greece** | 77.2 | 9 | 67 | 32.9 |
| **Spain** | 70.1 | 1.2 | 61.2 | 23.2 |
| **France** | 65.2 | 3.2 | 64.4 | 24.3 |
| **Croatia** | 63.2 | 1.3 | 60.3 | 20.2 |
| **Italy** | 73 | 2 | 67.4 | 21.9 |
| **Cyprus** | 77.8 | 0.1 | 66 | 33.5 |
| **Latvia** | 50.2 | 5.4 | 54.2 | 15.0 |
| **Lithuania** | 48.1 | 2.9 | 60.3 | 18.5 |
| **Luxembourg** | 74.4 | 0.5 | 60.2 | 19.1 |
| **Hungary** | 63.1 | 1.4 | 62.6 | 14.4 |
| **Malta** | 76.7 | 0.3 | 70.2 | 24.0 |
| **Netherlands** | 71.2 | 0.2 | 58.5 | 9.1 |
| **Austria** | 70.1 | 0.5 | 60.9 | 10.5 |
| **Poland** | 62.3 | 2.3 | 62.4 | 23.6 |
| **Portugal** | 49.5 | 2.9 | 59.1 | 18.8 |
| **Romania** | 73.3 | 4.9 | 59 | 27.6 |
| **Slovenia** | 67.8 | 3.7 | 66.7 | 12.4 |
| **Slovakia** | 66.1 | 2.8 | 57.3 | 20.8 |
| **Finland** | 64.5 | 6.5 | 57.9 | 12.5 |
| **Sweden** | 66.7 | 1.8 | 66.5 | 11.2 |

|  | **SDG 4** |  |  |  |  |  |
| --- | --- | --- | --- | --- | --- | --- |
|  | **Tertiary educational attainment by sex [SDG_04_20]** | **Participation in early childhood education by sex (children aged 3 and over) [SDG_04_31]** | **Adult participation in learning by sex [SDG_04_60]** | **Early leavers from education and training by sex [SDG_04_10]** | **Low achieving 15-year-olds in reading, mathematics or science (sdg_04_40)** | **Share of individuals having at least basic digital skills, by sex (sdg_04_70)** |
| **Belgium** | 51.4 | 98.4 | 10.3 | 6.4 | 25.3 | 59.39 |
| **Bulgaria** | 34 | 80.4 | 1.6 | 10.3 | 52.9 | 35.52 |
| **Czechia** | 34.6 | 85.3 | 9.4 | 6.2 | 21.3 | 69.11 |
| **Denmark** | 49 | 97.1 | 27.9 | 10 | 19.0 | 69.62 |
| **Germany** | 36.7 | 93.1 | 8.1 | 12.7 | 25.5 | 52.22 |
| **Estonia** | 43.9 | 91.9 | 21.1 | 10.8 | 13.8 | 62.61 |
| **Ireland** | 63 | 93.2 | 11.8 | 3.7 | 11.4 | 72.91 |
| **Greece** | 45.2 | 69 | 3.5 | 4.1 | 37.6 | 52.40 |
| **Spain** | 50.2 | 96.7 | 15.2 | 13.9 | 24.4 | 66.18 |
| **France** | 50.4 | 100.0 | 13.3 | 7.6 | 26.9 | 59.67 |
| **Croatia** | 36.0 | 83.5 | 4.9 | 2.1 | 22.7 | 58.95 |
| **Italy** | 29.2 | 92.7 | 9.6 | 11.5 | 21.4 | 45.75 |
| **Cyprus** | 59.2 | 84.4 | 10.5 | 8.1 | 60.6 | 49.46 |
| **Latvia** | 45.9 | 95.5 | 9.7 | 6.7 | 22.8 | 45.34 |
| **Lithuania** | 58.2 | 96.7 | 8.5 | 4.8 | 24.9 | 52.91 |
| **Luxembourg** | 61 | 90.5 | 18.1 | 8.2 | 29 | 60.14 |
| **Hungary** | 31.9 | 92.6 | 7.9 | 12.4 | 25.9 | 58.89 |
| **Malta** | 42.5 | 87.5 | 13 | 10.3 | 36.3 | 63.02 |
| **Netherlands** | 56.4 | 92 | 26.4 | 5.6 | 34.6 | 82.70 |
| **Austria** | 43.1 | 90.6 | 15.8 | 8.4 | 25.3 | 64.68 |
| **Poland** | 41.7 | 92.4 | 7.8 | 4.7 | 22.2 | 44.30 |
| **Portugal** | 42.9 | 96.3 | 13.4 | 6.3 | 23.1 | 55.97 |
| **Romania** | 24.7 | 74.8 | 5.4 | 15.6 | 41.7 | 27.73 |
| **Slovenia** | 47.3 | 92.7 | 22.3 | 4 | 26.1 | 46.70 |
| **Slovakia** | 39.1 | 78.6 | 12.8 | 7.4 | 35.4 | 51.31 |
| **Finland** | 40.7 | 89. | 25.2 | 8.4 | 21.4 | 81.99 |
| **Sweden** | 52.4 | 96.1 | 36.2 | 8.8 | 24.3 | 66.44 |

|  | **SDG 5** |  |  |  |  |
| --- | --- | --- | --- | --- | --- |
|  | **Inactive population due to caring responsibilities by sex [SDG_05_40]** | **Positions held by women in senior management positions (source: EIGE) [SDG_05_60]** | **Seats held by women in national parliaments and governments (source: EIGE) [SDG_05_50] -- NAT PARL** | **Gender pay gap in unadjusted form [SDG_05_20]** | **Gender employment gap, by type of employment (sdg_05_30)** |
| **Belgium** | 0.2 | 15.1 | 43.8 | 5 | 7.6 |
| **Bulgaria** | 0 | 22 | 23.8 | 13 | 7.5 |
| **Czechia** | 0.2 | 12.1 | 23. | 17.9 | 14.9 |
| **Denmark** | 0.1 | 22 | 42.5 | 13.9 | 5.4 |
| **Germany** | 1 | 22.1 | 35.1 | 17.7 | 7.7 |
| **Estonia** | 0.5 | 22.9 | 27.7 | 21.3 | 2.9 |
| **Ireland** | 1 | 25.7 | 27.9 | 9.3 | 11.4 |
| **Greece** | 0.5 | 15.9 | 19 | 10 | 21.0 |
| **Spain** | 0.7 | 18.8 | 41 | 8.7 | 11.2 |
| **France** | 0.4 | 27.4 | 36.6 | 13.9 | 5.8 |
| **Croatia** | 0.4 | 20 | 32.5 | 12.5 | 9.4 |
| **Italy** | 0.8 | 14.1 | 33 | 4.3 | 19.7 |
| **Cyprus** | 0.5 | 17.9 | 14.3 | 10.2 | 12.1 |
| **Latvia** | 0.6 | 25.7 | 30.3 | 17.1 | 3.1 |
| **Lithuania** | 0.2 | 28.9 | 27.7 | 12.0 | 0.8 |
| **Luxembourg** | 0.3 | 6.5 | 35 | -0.7 | 6.5 |
| **Hungary** | 0.3 | 17.9 | 13.1 | 17.5 | 9.8 |
| **Malta** | 0.3 | 23.9 | 27.8 | 10.2 | 13.3 |
| **Netherlands** | 0.5 | 18.7 | 36 | 13 | 7.9 |
| **Austria** | 0.7 | 9.5 | 41.4 | 18.4 | 7.8 |
| **Poland** | 0.5 | 14.4 | 27.5 | 7.8 | 12.9 |
| **Portugal** | 0.3 | 19.7 | 35.7 | 12.5 | 5.8 |
| **Romania** | 0 | 23.8 | 20.0 | 4.5 | 18.6 |
| **Slovenia** | 0.2 | 22.2 | 29.5 | 8.2 | 6.9 |
| **Slovakia** | 0.2 | 19.2 | 22 | 17.7 | 8.1 |
| **Finland** | 0.1 | 27.4 | 45.5 | 15.5 | 1.2 |
| **Sweden** | 0.1 | 28.5 | 46.4 | 11.1 | 5.7 |

|  | **SDG 6** |
| --- | --- |
|  | **Population connected to at least secondary waste water treatment [SDG_06_20]** |
| **Belgium** | 84.04 |
| **Bulgaria** | 65.3 |
| **Czechia** | 84.90 |
| **Denmark** | 97.93 |
| **Germany** | 96 |
| **Estonia** | 82.00 |
| **Ireland** | 64.72 |
| **Greece** | 94.90 |
| **Spain** | 86.93 |
| **France** | 79.56 |
| **Croatia** | 59.60 |
| **Italy** | 60 |
| **Cyprus** | 83.48 |
| **Latvia** | 77.2 |
| **Lithuania** | 76.03 |
| **Luxembourg** | 97 |
| **Hungary** | 81.73 |
| **Malta** | 7.41 |
| **Netherlands** | 99.65 |
| **Austria** | 99.15 |
| **Poland** | 75.68 |
| **Portugal** | 56 |
| **Romania** | 53.94 |
| **Slovenia** | 68.45 |
| **Slovakia** | 70.60 |
| **Finland** | 85.00 |
| **Sweden** | 98.00 |

|  | **SDG 7** |  |  |  |  |  |  |
| --- | --- | --- | --- | --- | --- | --- | --- |
|  | **Population unable to keep home adequately warm by poverty status (sdg_07_60)** | **Final energy consumption [SDG_07_11]** | **Energy import dependency by products [SDG_07_50]** | **Share of renewable energy in gross final energy consumption by sector [SDG_07_40]** | **Primary energy consumption [SDG_07_10]** | **Final energy consumption in households per capita (sdg_07_20)** | **Energy productivity (sdg_07_30)** |
| **Belgium** | 5.1 | 2.73 | 73.95 | 19.044 | 45.2 | 604 | 7.22 |
| **Bulgaria** | 22.5 | 1.53 | 37.132 | 18.123 | 18.9 | 331 | 2.53 |
| **Czechia** | 2.9 | 2.25 | 41.793 | 42.383 | 38.6 | 671 | 4.71 |
| **Denmark** | 5.1 | 2.26 | 42.867 | 20.913 | 15.7 | 685 | 17.75 |
| **Germany** | 6.7 | 2.35 | 68.555 | 38.542 | 261.1 | 685 | 10.64 |
| **Estonia** | 3.4 | 2.06 | 6.159 | 13.068 | 4.7 | 715 | 4.19 |
| **Ireland** | 6.8 | 2.28 | 79.155 | 22.671 | 14.3 | 520 | 26.77 |
| **Greece** | 18.7 | 1.54 | 79.601 | 21.896 | 20.9 | 414 | 8.32 |
| **Spain** | 17.1 | 1.70 | 74.347 | 20.445 | 113.5 | 297 | 9.26 |
| **France** | 10.7 | 1.99 | 51.917 | 28.088 | 205.9 | 548 | 10.28 |
| **Croatia** | 7 | 1.79 | 60.303 | 19.131 | 8.3 | 593 | 6.76 |
| **Italy** | 8.8 | 1.88 | 79.165 | 19.427 | 139.7 | 509 | 11.08 |
| **Cyprus** | 19.2 | 1.99 | 92.018 | 43.720 | 2.5 | 395 | 8.77 |
| **Latvia** | 7.1 | 2.09 | 38.747 | 29.599 | 4.3 | 593 | 5.53 |
| **Lithuania** | 17.5 | 1.90 | 72.434 | 14.429 | 6.3 | 550 | 5.87 |
| **Luxembourg** | 2.1 | 5.62 | 91.317 | 15.193 | 3.8 | 695 | 14.70 |
| **Hungary** | 4.7 | 1.89 | 64.183 | 13.969 | 23.9 | 606 | 5.39 |
| **Malta** | 7.6 | 1.32 | 99.009 | 14.902 | 0.9 | 217 | 4.30 |
| **Netherlands** | 5.3 | 2.38 | 80.266 | 34.075 | 56.2 | 485 | 9.85 |
| **Austria** | 2.7 | 2.78 | 74.454 | 16.847 | 30.3 | 762 | 10.63 |
| **Poland** | 4.9 | 1.94 | 46.029 | 34.675 | 98.6 | 561 | 5.29 |
| **Portugal** | 17.5 | 1.60 | 71.274 | 24.229 | 20.8 | 283 | 8.54 |
| **Romania** | 15.2 | 1.26 | 32.412 | 25.002 | 31.0 | 414 | 6.03 |
| **Slovenia** | 2.6 | 2.24 | 53.966 | 17.481 | 6.2 | 500 | 7.24 |
| **Slovakia** | 7.1 | 1.82 | 69.63 | 47.740 | 15.4 | 495 | 5.40 |
| **Finland** | 1.4 | 4.12 | 40.884 | 66.287 | 30.2 | 1,008 | 6.36 |
| **Sweden** | 3.3 | 2.88 | 26.824 | 66.287 | 42.6 | 673 | 10.11 |

|  | **SDG 8** |  |  |  |  |
| --- | --- | --- | --- | --- | --- |
|  | **Real GDP per capita [SDG_08_10]** | **Young people neither in employment nor in education and training by sex (NEET) [SDG_08_20]** | **Investment share of GDP by institutional sectors [SDG_08_11]** | **Long-term unemployment rate by sex [SDG_08_40]** | **Employment rate by sex [SDG_08_30]** |
| **Belgium** | 37,170 | 9.2 | 23.85 | 2.3 | 71.9 |
| **Bulgaria** | 7,730 | 14.8 | 19 | 2.2 | 75.9 |
| **Czechia** | 18,690 | 11.4 | 27.69 | 0.6 | 81.3 |
| **Denmark** | 51,600 | 7.9 | 22.81 | 0.5 | 80.1 |
| **Germany** | 36,690 | 8.8 | 21.71 | 1.1 | 80.6 |
| **Estonia** | 16,130 | 10.6 | 25.78 | 1.3 | 81.9 |
| **Ireland** | 77,300 | 8.6 | 21.17 | 1.3 | 78.2 |
| **Greece** | 18,960 | 15.3 | 14.93 | 7.7 | 66.3 |
| **Spain** | 25,270 | 12.7 | 20.41 | 5.1 | 69.3 |
| **France** | 33,540 | 12 | 23.65 | 2 | 74 |
| **Croatia** | 14,630 | 13.1 | 21.60 | 2.4 | 70.2 |
| **Italy** | 28,670 | 19 | 21.85 | 4.6 | 64.8 |
| **Cyprus** | 28,790 | 14.7 | 19.89 | 2.3 | 77.9 |
| **Latvia** | 13,040 | 11.3 | 23.02 | 2 | 77 |
| **Lithuania** | 15,500 | 10.7 | 22.48 | 2.3 | 79 |
| **Luxembourg** | 85,850 | 6.8 | 17.51 | 1.3 | 74.8 |
| **Hungary** | 14,540 | 10.8 | 27.92 | 1.2 | 80.2 |
| **Malta** | 25,450 | 7.6 | 24.24 | 1.2 | 80.1 |
| **Netherlands** | 44,870 | 4.2 | 20.47 | 0.7 | 82.9 |
| **Austria** | 38,560 | 9.1 | 25.47 | 1.2 | 77.3 |
| **Poland** | 14,800 | 10.7 | 16.44 | 0.9 | 76.7 |
| **Portugal** | 18,970 | 8.5 | 20.57 | 2.8 | 77.1 |
| **Romania** | 10,020 | 19.8 | 25.04 | 2.2 | 68.5 |
| **Slovenia** | 21,790 | 8.4 | 21.92 | 1.6 | 77.9 |
| **Slovakia** | 16,480 | 12.3 | 19.59 | 4.1 | 76.7 |
| **Finland** | 37,330 | 9.3 | 24.93 | 1.5 | 78.4 |
| **Sweden** | 45,100 | 5.6 | 25.55 | 1.9 | 82 |

|  | **SDG 9** |  |  |  |  |
| --- | --- | --- | --- | --- | --- |
|  | **Gross domestic expenditure on R&D by sector [SDG_09_10]** | **R&D personnel by sector [SDG_09_30]** | **Share of buses and trains in inland passenger transport [SDG_09_50]** | **Share of rail and inland waterways in inland freight transport [SDG_09_60]** | **Air emission intensity from industry (sdg_09_70)** |
| **Belgium** | 0.75 | 2.41 | 17.5 | 23.5 | 0.06 |
| **Bulgaria** | 1.89 | 0.91 | 13.1 | 39.5 | 0.29 |
| **Czechia** | 2.87 | 1.68 | 18.8 | 22.2 | 0.03 |
| **Denmark** | 3.07 | 2.36 | 19.2 | 9.6 | 0.01 |
| **Germany** | 1.76 | 1.86 | 15.3 | 26.6 | 0.02 |
| **Estonia** | 1 | 1.19 | 14.4 | 27.3 | 0.14 |
| **Ireland** | 1.48 | 1.55 | 18.4 | 0.7 | 0.01 |
| **Greece** | 1.41 | 1.5 | 15.4 | 2.3 | 0.17 |
| **Spain** | 2.22 | 1.13 | 16.0 | 4.4 | 0.09 |
| **France** | 1.42 | 1.67 | 15.7 | 12.6 | 0.08 |
| **Croatia** | 1.37 | 0.96 | 14.5 | 30.2 | 0.11 |
| **Italy** | 0.7 | 1.38 | 18.3 | 12.4 | 0.07 |
| **Cyprus** | 0.81 | 0.48 | 15.6 | 0 | 0.24 |
| **Latvia** | 1.05 | 0.76 | 15.3 | 53.2 | 0.45 |
| **Lithuania** | 1.05 | 1 | 7.1 | 46.4 | 0.06 |
| **Luxembourg** | 1.39 | 1.91 | 16.9 | 13.7 | 0.05 |
| **Hungary** | 0.58 | 1.32 | 23.8 | 30.2 | 0.07 |
| **Malta** | 2.18 | 0.75 | 17.1 | 0 | 0.01 |
| **Netherlands** | 3.18 | 1.92 | 14.5 | 47.6 | 0.04 |
| **Austria** | 1.44 | 2.02 | 22.7 | 31.9 | 0.02 |
| **Poland** | 1.69 | 1.13 | 17.3 | 23.2 | 0.13 |
| **Portugal** | 0.46 | 1.48 | 11.6 | 12.3 | 2.24 |
| **Romania** | 2.1 | 0.43 | 17.6 | 46. | 0.17 |
| **Slovenia** | 0.98 | 1.72 | 13.9 | 32.7 | 0.09 |
| **Slovakia** | 2.98 | 0.86 | 21.0 | 33.1 | 0.05 |
| **Finland** | 3.47 | 2.1 | 15.8 | 23. | 0.06 |
| **Sweden** | 3.47 | 2.25 | 19.0 | 28.9 | 0.04 |

|  | **SDG 10** |  |  |  |  |  |
| --- | --- | --- | --- | --- | --- | --- |
|  | **Purchasing power adjusted GDP per capita [SDG_10_10]** | **Income distribution [SDG_10_41]** | **Adjusted gross disposable income of households per capita [SDG_10_20]** | **Relative median at-risk-of-poverty gap [SDG_10_30]** | **Income share of the bottom 40 % of the population (sdg_10_50)** | **Asylum applications by state of procedure (sdg_10_60)** |
| **Belgium** | 42,700 | 3.56 | 30,076 | 18.2 | 24.1 | 2,748 |
| **Bulgaria** | 22,500 | 7.3 | 10,500 | 26. | 17.0 | 3,134 |
| **Czechia** | 32,200 | 3.48 | 23,952 | 18.3 | 24.6 | 125 |
| **Denmark** | 48,500 | 4.03 | 26,384 | 19.4 | 23.3 | 758 |
| **Germany** | 42,400 | 4.38 | 33,124 | 20.3 | 22.1 | 2,598 |
| **Estonia** | 30,300 | 5.39 | 19,074 | 23.4 | 19.5 | 2,180 |
| **Ireland** | 85,500 | 3.81 | 24,345 | 16.7 | 23.3 | 2,618 |
| **Greece** | 24,100 | 5.2 | 17,916 | 23.8 | 20.5 | 2,791 |
| **Spain** | 31,600 | 5.63 | 21,858 | 27.8 | 19.8 | 2,430 |
| **France** | 35,200 | 4.6 | 29,242 | 20.2 | 22.0 | 2,020 |
| **Croatia** | 25,900 | 4.57 | 17,963 | 25.3 | 21.8 | 690 |
| **Italy** | 35,200 | 5.62 | 25,656 | 26.1 | 19.8 | 1,308 |
| **Cyprus** | 35,100 | 4.28 | 26,394 | 16. | 22.1 | 23,655 |
| **Latvia** | 25,000 | 6.33 | 16,475 | 27.7 | 18.7 | 290 |
| **Lithuania** | 31,700 | 6.39 | 22,182 | 22.8 | 18.4 | 320 |
| **Luxembourg** | 90,500 | 4.54 | 37,182 | 18.2 | 21.5 | 3,682 |
| **Hungary** | 27,600 | 3.99 | 19,015 | 19.4 | 23.3 | 5 |
| **Malta** | 37,800 | 4.75 | 22,852 | 16.5 | 21.3 | 1,723 |
| **Netherlands** | 48,400 | 3.94 | 30,351 | 19.2 | 23.2 | 2,006 |
| **Austria** | 44,300 | 4.25 | 31,052 | 23.9 | 22.7 | 12,141 |
| **Poland** | 28,200 | 3.91 | 20,644 | 20.7 | 23.5 | 209 |
| **Portugal** | 27,800 | 5.13 | 21,691 | 21.7 | 20.9 | 189 |
| **Romania** | 26,500 | 6 | 18,396 | 32 | 19.4 | 633 |
| **Slovenia** | 32,100 | 3.28 | 22,691 | 17.1 | 25.2 | 3,146 |
| **Slovakia** | 25,700 | 3.12 | 18,558 | 18.4 | 26.0 | 92 |
| **Finland** | 38,400 | 3.75 | 27,196 | 14.8 | 23.7 | 867 |
| **Sweden** | 41,400 | 4.34 | 27,614 | 21.5 | 22.4 | 1,257 |

|  | **SDG 11** |  |  |  |
| --- | --- | --- | --- | --- |
|  | **Population living in households considering that they suffer from noise, by poverty status [SDG_11_20]** | **Road traffic deaths, by type of roads (source: DG MOVE) [SDG_11_40]** | **Recycling rate of municipal waste [SDG_11_60]** | **Premature deaths due to exposure to fine particulate matter (PM2.5) (sdg_11_52)** |
| **Belgium** | 14.4 | 4.6 | 54.7 | 44 |
| **Bulgaria** | 8.7 | 8.2 | 24.6 | 158 |
| **Czechia** | 15.5 | 4.9 | 43.3 | 81 |
| **Denmark** | 15.6 | 2.6 | 45.7 | 21 |
| **Germany** | 25.2 | 3.3 | 69.2 | 39 |
| **Estonia** | 9.6 | 3.6 | 33.2 | 7 |
| **Ireland** | 10.0 | 3. | 40.8 | 9 |
| **Greece** | 21.2 | 6.3 | 17.3 | 95 |
| **Spain** | 23.6 | 3.7 | 38.6 | 30 |
| **France** | 21.1 | 4.8 | 41.2 | 30 |
| **Croatia** | 6.7 | 7.1 | 34.2 | 96 |
| **Italy** | 11.2 | 5.4 | 53.3 | 79 |
| **Cyprus** | 18.6 | 4.1 | 14.8 | 70 |
| **Latvia** | 12.4 | 6. | 50.8 | 75 |
| **Lithuania** | 10.1 | 4.2 | 48.4 | 77 |
| **Luxembourg** | 30.2 | 5.5 | 54.6 | 12 |
| **Hungary** | 10. | 5.6 | 32.8 | 107 |
| **Malta** | 31.3 | 4.9 | 12.5 | 37 |
| **Netherlands** | 28.2 | 3.7 | 57.5 | 32 |
| **Austria** | 20. | 4.1 | 62.6 | 36 |
| **Poland** | 9 | 5.1 | 40.9 | 125 |
| **Portugal** | 28.7 | 5.9 | 30.2 | 20 |
| **Romania** | 19.5 | 8.6 | 12.3 | 103 |
| **Slovenia** | 13.9 | 4. | 62.6 | 56 |
| **Slovakia** | 8.6 | 4.9 | 49.5 | 98 |
| **Finland** | 23. | 3.5 | 43.7 | 3 |
| **Sweden** | 10.7 | 2.2 | 39.7 | 6 |

|  |  | **SDG 12** |  |  |  |
| --- | --- | --- | --- | --- | --- |
|  |  | **Circular material use rate [SDG_12_41]** | **Raw material consumption - Tonnes per capita (RMC) (sdg_12_21)** | **Consumption footprint – Per inhabitant - single weighted score (sdg_12_31)** | **Generation of waste by hazardousness (sdg_12_51)** |
| **Belgium** |  | 18.3 | 16.127 | 1.04 | 5,363 |
| **Bulgaria** |  | 3 | 22.959 | 0.73 | 14,603 |
| **Czechia** |  | 11.3 | 18.095 | 0.9 | 3,672 |
| **Denmark** |  | 9.3 | 28.211 | 1.22 | 3,333 |
| **Germany** |  | 12.5 | 14.963 | 1.03 | 4,604 |
| **Estonia** |  | 21.4 | 27.161 | 0.97 | 16,752 |
| **Ireland** |  | 2.1 | 15.685 | 1.11 | 2,971 |
| **Greece** |  | 6.3 | 11.942 | 0.86 | 2,858 |
| **Spain** |  | 9.4 | 9.191 | 1.07 | 2,480 |
| **France** |  | 17.5 | 13.405 | 0.98 | 5,076 |
| **Croatia** |  | 6.8 | 14.692 | 0.9 | 1,838 |
| **Italy** |  | 20.6 | 11.319 | 1.09 | 3,212 |
| **Cyprus** |  | 8.5 | 19.498 | 1.11 | 3,294 |
| **Latvia** |  | 4.5 | 19.467 | 0.98 | 1,330 |
| **Lithuania** |  | 4 | 22.129 | 0.93 | 2,003 |
| **Luxembourg** |  | 12.3 | 31.71 | 1.34 | 15,169 |
| **Hungary** |  | 4.9 | 14.358 | 0.73 | 2,838 |
| **Malta** |  | 21.5 | 11.947 | 1.15 | 5,004 |
| **Netherlands** |  | 27.2 | 9.728 | 0.84 | 6,921 |
| **Austria** |  | 12.4 | 22.566 | 0.95 | 8,079 |
| **Poland** |  | 6.7 | 17.374 | 0.86 | 4,739 |
| **Portugal** |  | 3.3 | 16.233 | 1.05 | 1,878 |
| **Romania** |  | 1.5 | 29.875 | 0.68 | 8,410 |
| **Slovenia** |  | 8.3 | 21.925 | 0.88 | 5,397 |
| **Slovakia** |  | 11.5 | 12.078 | 0.73 | 2,462 |
| **Finland** |  | 5.4 | 24.582 | 1.12 | 19,950 |
| **Sweden** |  | 12.1 | 49.369 | 1.08 | 15,627 |

|  | **SDG 13** |  |  |  |  |
| --- | --- | --- | --- | --- | --- |
|  | **Net greenhouse gas emissions (source: EEA) [SDG_13_10]** | **Population covered by the Covenant of Mayors for Climate & Energy signatories (source: Covenant of Mayors) [SDG_13_60] NOT IN GOAL 13 ANYMORE - percentage** | **Net greenhouse gas emissions of the Land use, Land use change and Forestry (LULUCF) sector - Tonnes per capita (sdg_13_21)** | **Average CO2 emissions per km from new passenger cars (sdg_13_31)** | **Green bond issuance by type of issuer (sdg_13_70)** |
| **Belgium** | 74.3 | 92.7 | 4.0 | 104.5 | 14.80 |
| **Bulgaria** | 60.4 | 40.6 | 2.5 | 134.3 | 0.00 |
| **Czechia** | 63.1 | 26.8 | 4.3 | 137.7 | 3.30 |
| **Denmark** | 54.8 | 54.8 | 3.9 | 86.3 | 13.90 |
| **Germany** | 60.3 | 23.8 | 4.1 | 105.9 | 13.30 |
| **Estonia** | 41.2 | 42.9 | 4.3 | 141.6 | 0.00 |
| **Ireland** | 110.3 | 61.8 | 4.8 | 100.7 | 6.30 |
| **Greece** | 73.8 | 76.2 | 3.5 | 118 | 2.70 |
| **Spain** | 101.4 | 71.8 | 3.0 | 121.5 | 7.60 |
| **France** | 73.7 | 27.6 | 3.7 | 103.1 | 5.90 |
| **Croatia** | 81.7 | 60.6 | 2.7 | 127.3 | 0.00 |
| **Italy** | 76.1 | 75.9 | 3.6 | 119.2 | 6.10 |
| **Cyprus** | 150.8 | 57.6 | 3.7 | 136.8 | 0.00 |
| **Latvia** | 111.7 | 60.4 | 6.6 | 134.6 | 10.50 |
| **Lithuania** | 29.9 | 49.2 | 1.8 | 135.9 | 0.00 |
| **Luxembourg** | 72.3 | 3.8 | 3.0 | 115.7 | 3.30 |
| **Hungary** | 58.1 | 56.8 | 3.3 | 131.2 | 15.30 |
| **Malta** | 94.1 | 26.5 | 4.0 | 91.4 | 0.00 |
| **Netherlands** | 72.2 | 28.4 | 4.3 | 86.8 | 11.10 |
| **Austria** | 103. | 23.9 | 3.5 | 112 | 8.30 |
| **Poland** | 77.6 | 16.9 | 3.0 | 135.7 | 3.80 |
| **Portugal** | 80.8 | 67.3 | 3.4 | 103.1 | 8.40 |
| **Romania** | 27.5 | 31.1 | 1.6 | 119.7 | 0.70 |
| **Slovenia** | 107.2 | 50.9 | 3.9 | 129.1 | 0.00 |
| **Slovakia** | 46.4 | 16.5 | 2.7 | 136.8 | 16.30 |
| **Finland** | 105.3 | 45.1 | 4.8 | 85.3 | 10.60 |
| **Sweden** | 27.6 | 47.7 | 0.1 | 66.6 | 16.20 |

|  | SDG 14 |  |  |
| --- | --- | --- | --- |
|  | **14 10 Surface of the marine protected areas** | **14 40 COASTAL Bathing sites with excellent water quality by location** | **14 40 INLAND Bathing sites with excellent water quality by location** |
| **Belgium** | 37.8 | 85.4 | 72.4 |
| **Bulgaria** | 8 | 92.4 | 100.0 |
| **Czechia** | 18 | 84 | 76.9 |
| **Denmark** | 18.7 | 93.9 | 97.5 |
| **Germany** | 45.4 | 86.5 | 90.9 |
| **Estonia** | 18.7 | 43.3 | 82.9 |
| **Ireland** | 2.3 | 78.4 | 88.9 |
| **Greece** | 19.8 | 96.6 | 100.0 |
| **Spain** | 12.4 | 92.8 | 55.9 |
| **France** | 45.4 | 77.6 | 73.2 |
| **Croatia** | 9.5 | 98.9 | 26.2 |
| **Italy** | 9.7 | 89.8 | 88.0 |
| **Cyprus** | 8.6 | 99.2 | 78 |
| **Latvia** | 15.8 | 81.8 | 68.0 |
| **Lithuania** | 22.8 | 87.5 | 89.5 |
| **Luxembourg** | 18 | 84 | 76.5 |
| **Hungary** | 18 | 84 | 63.1 |
| **Malta** | 5.5 | 94.3 | 78 |
| **Netherlands** | 26.1 | 85.7 | 73.5 |
| **Austria** | 18 | 84 | 96.9 |
| **Poland** | 21.9 | 50.8 | 57.7 |
| **Portugal** | 4.5 | 90.8 | 65.6 |
| **Romania** | 21.4 | 91.8 | 100.0 |
| **Slovenia** | 5 | 95.2 | 65.4 |
| **Slovakia** | 18 | 84 | 59.4 |
| **Finland** | 11 | 73.1 | 95.1 |
| **Sweden** | 16 | 70.1 | 81.0 |

|  | SDG 15 |
| --- | --- |
|  | **15 20 Surface of the terrestrial protected areas** |
| **Belgium** | 14.7 |
| **Bulgaria** | 41 |
| **Czechia** | 21.8 |
| **Denmark** | 15.1 |
| **Germany** | 38.5 |
| **Estonia** | 21 |
| **Ireland** | 13.9 |
| **Greece** | 34.6 |
| **Spain** | 28.1 |
| **France** | 28.1 |
| **Croatia** | 38.2 |
| **Italy** | 21.4 |
| **Cyprus** | 37.8 |
| **Latvia** | 18.1 |
| **Lithuania** | 17.8 |
| **Luxembourg** | 37.9 |
| **Hungary** | 22.2 |
| **Malta** | 28.7 |
| **Netherlands** | 22.7 |
| **Austria** | 29.3 |
| **Poland** | 39.6 |
| **Portugal** | 22.4 |
| **Romania** | 23.5 |
| **Slovenia** | 40.5 |
| **Slovakia** | 37.3 |
| **Finland** | 13.4 |
| **Sweden** | 15 |

|  | **SDG 16** |  |  |  |  |
| --- | --- | --- | --- | --- | --- |
|  | **Population reporting occurrence of crime, violence or vandalism in their area by poverty status [SDG_16_20]** | **Perceived independence of the justice system (source: DG COMM) [SDG_16_40]** | **Population with confidence in EU institutions by institution (source: DG COMM) [SDG_16_60]** | **Corruption Perceptions Index (sdg_16_50)** | **Victims of trafficking in human beings by sex (sdg_16_70)** |
| **Belgium** | 12.5 | 60 | 51 | 73 | 1.99 |
| **Bulgaria** | 15.6 | 31 | 44 | 43 | 0.60 |
| **Czechia** | 6.6 | 57 | 48 | 56 | 0.18 |
| **Denmark** | 6.3 | 84 | 64 | 90 | 1.24 |
| **Germany** | 10.7 | 76 | 53 | 79 | 2.01 |
| **Estonia** | 4.3 | 60 | 60 | 74 | 6.53 |
| **Ireland** | 11 | 73 | 64 | 77 | 0.83 |
| **Greece** | 20.9 | 53 | 44 | 52 | 3.42 |
| **Spain** | 13.6 | 38 | 40 | 60 | 0.48 |
| **France** | 14.7 | 56 | 33 | 72 | 2.99 |
| **Croatia** | 1.4 | 21 | 54 | 50 | 0.75 |
| **Italy** | 6.4 | 37 | 54 | 56 | 3.64 |
| **Cyprus** | 9.7 | 50 | 51 | 52 | 1.77 |
| **Latvia** | 5.4 | 53 | 47 | 59 | 1.39 |
| **Lithuania** | 2.7 | 52 | 53 | 62 | 0.53 |
| **Luxembourg** | 7.4 | 77 | 57 | 77 | 11.93 |
| **Hungary** | 6.1 | 43 | 61 | 42 | 2.30 |
| **Malta** | 7.4 | 67 | 64 | 51 | 4.22 |
| **Netherlands** | 16.7 | 77 | 57 | 80 | 4.63 |
| **Austria** | 7.0 | 83 | 48 | 71 | 5.01 |
| **Poland** | 2.8 | 24 | 55 | 55 | 0.74 |
| **Portugal** | 6.9 | 47 | 70 | 62 | 2.38 |
| **Romania** | 5.9 | 48 | 49 | 46 | 2.63 |
| **Slovenia** | 6.8 | 49 | 43 | 56 | 0.24 |
| **Slovakia** | 3.4 | 25 | 43 | 53 | 1.07 |
| **Finland** | 11.5 | 88 | 52 | 87 | 4.31 |
| **Sweden** | 9.4 | 74 | 61 | 83 | 1.64 |

|  | **SDG 17** |  |  |  |
| --- | --- | --- | --- | --- |
|  | **Official development assistance as share of gross national income (source: DG INTPA, OECD) [SDG_17_10]** | **High-speed internet coverage, by type of area (source: DG CNECT and Eurostat) [SDG_17_60]** | **General government gross debt (sdg_17_40)** | **Share of environmental taxes in total tax revenues (sdg_17_50)** |
| **Belgium** | 0.45 | 78.3 | 102.6 | 5.12 |
| **Bulgaria** | 0.27 | 85.6 | 22.5 | 15.32 |
| **Czechia** | 0.38 | 53.2 | 42.5 | 4.18 |
| **Denmark** | 0.67 | 96.3 | 34.1 | 5.82 |
| **Germany** | 0.85 | 70.1 | 65.0 | 4.01 |
| **Estonia** | 0.54 | 79.2 | 19.1 | 7 |
| **Ireland** | 0.63 | 83.8 | 43.1 | 4.16 |
| **Greece** | 0.17 | 27.8 | 177.0 | 13.6 |
| **Spain** | 0.3 | 93.3 | 109.5 | 4.05 |
| **France** | 0.56 | 73.3 | 111.2 | 4.5 |
| **Croatia** | 0.19 | 61.5 | 68.5 | 9.04 |
| **Italy** | 0.33 | 53.7 | 138.3 | 5.17 |
| **Cyprus** | 0.05 | 60. | 81.0 | 6 |
| **Latvia** | 0.21 | 91.5 | 44.4 | 7.35 |
| **Lithuania** | 0.36 | 78. | 38.1 | 4.81 |
| **Luxembourg** | 1 | 93.3 | 24.6 | 3.19 |
| **Hungary** | 0.26 | 80.3 | 73.8 | 5.35 |
| **Malta** | 0.28 | 100.0 | 49.4 | 5.75 |
| **Netherlands** | 0.67 | 97.8 | 48.3 | 6.17 |
| **Austria** | 0.39 | 54.8 | 78.4 | 4.36 |
| **Poland** | 0.53 | 70.7 | 48.8 | 8.12 |
| **Portugal** | 0.21 | 93. | 111.2 | 5.32 |
| **Romania** | 0.14 | 95.6 | 47.9 | 10.05 |
| **Slovenia** | 0.29 | 75.5 | 72.7 | 7.64 |
| **Slovakia** | 0.15 | 71.3 | 57.7 | 7.1 |
| **Finland** | 0.57 | 70.8 | 74.0 | 5.65 |
| **Sweden** | 0.89 | 84.6 | 33.6 | 4.58 |

Table S2. Unit of measurement and direction of the goal

| **Indicator** | **Unit of measurement** | **Goal** |
| --- | --- | --- |
| People at risk of poverty or social exclusion (sdg_01_10) | Percentage | BOTTOM |
| Housing cost overburden rate by poverty status [SDG_01_50] | Percentage | BOTTOM |
| People at risk of income poverty after social transfers [SDG_01_20] | Percentage | BOTTOM |
| Severe material and social deprivation rate by age group and sex (sdg_01_31) | Percentage | BOTTOM |
| Persons living in households with very low work intensity, by age group (sdg_01_40) | Percentage less than 65 years | BOTTOM |
| In work at-risk-of-poverty rate (sdg_01_41) | Percentage | BOTTOM |
| Agricultural factor income per annual work unit (AWU) (source: Eurostat, DG AGRI) (sdg_02_20) | Euro per annual work unit | TOP |
| Area under organic farming [SDG_02_40] | Percentage of total utilised agricultural area | TOP |
| Obesity rate by body mass index (BMI) (sdg_02_10) | Percentage | BOTTOM |
| Ammonia emissions from agriculture (source: EEA) [SDG_02_60] | KG per hectare | BOTTOM |
| Government support to agricultural research and development [SDG_02_30] | Euro per inhabitant | TOP |
| Share of people with good or very good perceived health by sex [SDG_03_20] | Percentage | TOP |
| Self-reported unmet need for medical examination and care by sex [SDG_03_60] | Percentage | BOTTOM |
| Healthy life years at birth by sex [SDG_03_11] | Years | TOP |
| Consumption of antibiotics in the community and hospital sectors – defined daily doses (DDD) per day (sdg_03_70) | Defined Daily Doses per day | BOTTOM |
| Tertiary educational attainment by sex [SDG_04_20] | Percentage | TOP |
| Participation in early childhood education by sex (children aged 3 and over) [SDG_04_31] | Percentage | TOP |
| Adult participation in learning by sex [SDG_04_60] | Percentage | TOP |
| Early leavers from education and training by sex [SDG_04_10] | Percentage | BOTTOM |
| Low achieving 15-year-olds in reading, mathematics or science (sdg_04_40) | Percentage | BOTTOM |
| Share of individuals having at least basic digital skills, by sex (sdg_04_70) | Percentage | TOP |
| Inactive population due to caring responsibilities by sex [SDG_05_40] | Percentage | BOTTOM |
| Positions held by women in senior management positions (source: EIGE) [SDG_05_60] | Percentage | TOP |
| Seats held by women in national parliaments and governments (source: EIGE) [SDG_05_50] -- NAT PARL | Percentage | TOP |
| Gender pay gap in unadjusted form [SDG_05_20] | Percentage | BOTTOM |
| Gender employment gap, by type of employment (sdg_05_30) | Percentage | TOP |
| Population connected to at least secondary waste water treatment [SDG_06_20] | Percentage | TOP |
| Population unable to keep home adequately warm by poverty status (sdg_07_60) | Percentage | BOTTOM |
| Final energy consumption [SDG_07_11] | Tonnes of oil equivalent (TOE) per capita | BOTTOM |
| Energy import dependency by products [SDG_07_50] | Percentage | BOTTOM |
| Share of renewable energy in gross final energy consumption by sector [SDG_07_40] | Percentage | TOP |
| Primary energy consumption [SDG_07_10] | Tonnes of oil equivalent (TOE) per capita | BOTTOM |
| Final energy consumption in households per capita (sdg_07_20) | Kilogram of oil equivalent (KGOE) | BOTTOM |
| Energy productivity (sdg_07_30) | Euro per kilogram of oil equivalent (KGOE) | TOP |
| Real GDP per capita [SDG_08_10] | Chain linked volumes (2020), eur per capita | TOP |
| Young people neither in employment nor in education and training by sex (NEET) [SDG_08_20] | Percentage | BOTTOM |
| Investment share of GDP by institutional sectors [SDG_08_11] | Percentage | TOP |
| Long-term unemployment rate by sex [SDG_08_40] | Percentage | BOTTOM |
| Employment rate by sex [SDG_08_30] | Percentage | TOP |
| Gross domestic expenditure on R&D by sector [SDG_09_10] | Percentage of gross domestic product (GDP) | TOP |
| R&D personnel by sector [SDG_09_30] | Percentage of population in the labour force - numerator in full-time equivalent (FTE) | TOP |
| Share of buses and trains in inland passenger transport [SDG_09_50] | Percentage | TOP |
| Share of rail and inland waterways in inland freight transport [SDG_09_60] | Percentage | TOP |
| Air emission intensity from industry (sdg_09_70) | Grams per euro, chain linked volumes (2010) | BOTTOM |
| Purchasing power adjusted GDP per capita [SDG_10_10] | Percentage | TOP |
| Income distribution [SDG_10_41] | Ratio | BOTTOM |
| Adjusted gross disposable income of households per capita [SDG_10_20] | Coefficient of variation for absolute value | TOP |
| Relative median at-risk-of-poverty gap [SDG_10_30] | Percentage | BOTTOM |
| Income share of the bottom 40 Percentage of the population (sdg_10_50) | Percentage | BOTTOM |
| Asylum applications by state of procedure (sdg_10_60) | Per million inhabitants | BOTTOM |
| Population living in households considering that they suffer from noise, by poverty status [SDG_11_20] | Percentage | BOTTOM |
| Road traffic deaths, by type of roads (source: DG MOVE) [SDG_11_40] | Rate | BOTTOM |
| Recycling rate of municipal waste [SDG_11_60] | Percentage | TOP |
| Premature deaths due to exposure to fine particulate matter (PM2.5) (sdg_11_52) | Rate | BOTTOM |
| Circular material use rate [SDG_12_41] | Percentage | TOP |
| Raw material consumption - Tonnes per capita (RMC) (sdg_12_21) | Tonnes per capita | BOTTOM |
| Consumption footprint – Per inhabitant - single weighted score (sdg_12_31) | Per inhabitant | BOTTOM |
| Generation of waste by hazardousness (sdg_12_51) | Kilograms per capita | BOTTOM |
| Net greenhouse gas emissions (source: EEA) [SDG_13_10] | Tones per capita | BOTTOM |
| Population covered by the Covenant of Mayors for Climate & Energy signatories (source: Covenant of Mayors) [SDG_13_60] NOT IN GOAL 13 ANYMORE | Tonnes per capita | TOP |
| Net greenhouse gas emissions of the Land use, Land use change and Forestry (LULUCF) sector - Tonnes per capita (sdg_13_21) | Tonnes per capita | BOTTOM |
| Average CO2 emissions per km from new passenger cars (sdg_13_31) | Grams per km | BOTTOM |
| Green bond issuance by type of issuer (sdg_13_70) | Percentage | TOP |
| Surface of the marine protected areas (sdg_14_10) | Percentage | BOTTOM |
| COASTAL Bathing sites with excellent water quality by location (sdg_14_40) | Percentage | TOP |
| INLAND Bathing sites with excellent water quality by location (sdg_14_40) | Percentage | TOP |
| Surface of the terrestrial protected areas (sdg_15_20) | Percentage | TOP |
| Population reporting occurrence of crime, violence or vandalism in their area by poverty status [SDG_16_20] | Percentage | BOTTOM |
| Perceived independence of the justice system (source: DG COMM) [SDG_16_40] | Percentage | TOP |
| Population with confidence in EU institutions by institution (source: DG COMM) [SDG_16_60] | Percentage | TOP |
| Corruption Perceptions Index (sdg_16_50) | Score | BOTTOM |
| Victims of trafficking in human beings by sex (sdg_16_70) | Per hundred thousand inhabitants | TOP |
| Official development assistance as share of gross national income (source: DG INTPA, OECD) [SDG_17_10] | Percentage | TOP |
| High-speed internet coverage, by type of area (source: DG CNECT and Eurostat) [SDG_17_60] | Percentage of households | TOP |
| General government gross debt (sdg_17_40) | Percentage of GDP | TOP |
| Share of environmental taxes in total tax revenues (sdg_17_50) | Percentage | TOP |

Table S3. Correlation matrix (The example refers to SDG 1 indicators. The complete matrix, which has not been included here for reasons of space, can be requested from the authors).

|  | **People at risk of poverty or social exclusion (sdg_01_10)** | **Housing cost overburden rate by poverty status [SDG_01_50]** | **People at risk of income poverty after social transfers [SDG_01_20]** | **Severe material and social deprivation rate by age group and sex (sdg_01_31)** | **Persons living in households with very low work intensity, by age group (sdg_01_40)** | **In work at-risk-of-poverty rate (sdg_01_41)** |
| --- | --- | --- | --- | --- | --- | --- |
| People at risk of poverty or social exclusion (sdg_01_10) | 1 |  |  |  |  |  |
| Housing cost overburden rate by poverty status [SDG_01_50] | 0.32 | 1 |  |  |  |  |
| People at risk of income poverty after social transfers [SDG_01_20] | 0.88 | 0.16 | 1 |  |  |  |
| Severe material and social deprivation rate by age group and sex (sdg_01_31) | 0.83 | 0.38 | 0.52 | 1 |  |  |
| Persons living in households with very low work intensity, by age group (sdg_01_40) | 0.22 | 0.32 | 0.09 | 0.09 | 1 |  |
| In work at-risk-of-poverty rate (sdg_01_41) | 0.70 | 0.31 | 0.70 | 0.52 | -0.23 | 1 |

Table S4. Concentration indicator at indicators level

| **Indicator** | **Value** |
| --- | --- |
| People at risk of poverty or social exclusion (sdg_01_10) | 0.608817 |
| Housing cost overburden rate by poverty status [SDG_01_50] | 0.777472 |
| People at risk of income poverty after social transfers [SDG_01_20] | 0.516769 |
| Severe material and social deprivation rate by age group and sex (sdg_01_31) | 0.797024 |
| Persons living in households with very low work intensity, by age group (sdg_01_40) | 0.561111 |
| In work at-risk-of-poverty rate (sdg_01_41) | 0.552778 |
| Agricultural factor income per annual work unit (AWU) (source: Eurostat, DG AGRI) (sdg_02_20) | 0.498737 |
| Area under organic farming [SDG_02_40] | 0.419138 |
| Obesity rate by body mass index (BMI) (sdg_02_10) | 0.395361 |
| Ammonia emissions from agriculture (source: EEA) [SDG_02_60] | 0.8426 |
| Government support to agricultural research and development [SDG_02_30] | 0.430344 |
| Share of people with good or very good perceived health by sex [SDG_03_20] | 0.576509 |
| Self-reported unmet need for medical examination and care by sex [SDG_03_60] | 0.726749 |
| Healthy life years at birth by sex [SDG_03_11] | 0.493519 |
| Consumption of antibiotics in the community and hospital sectors – defined daily doses (DDD) per day (sdg_03_70) | 0.573315 |
| Tertiary educational attainment by sex [SDG_04_20] | 0.525771 |
| Participation in early childhood education by sex (children aged 3 and over) [SDG_04_31] | 0.680437 |
| Adult participation in learning by sex [SDG_04_60] | 0.349497 |
| Early leavers from education and training by sex [SDG_04_10] | 0.554733 |
| Low achieving 15-year-olds in reading, mathematics or science (sdg_04_40) | 0.662526 |
| Share of individuals having at least basic digital skills, by sex (sdg_04_70) | 0.543866 |
| Inactive population due to caring responsibilities by sex [SDG_05_40] | 0.670782 |
| Positions held by women in senior management positions (source: EIGE) [SDG_05_60] | 0.606481 |
| Seats held by women in national parliaments and governments (source: EIGE) [SDG_05_50] -- NAT PARL | 0.538761 |
| Gender pay gap in unadjusted form [SDG_05_20] | 0.424579 |
| Gender employment gap, by type of employment (sdg_05_30) | 0.409608 |
| Population connected to at least secondary waste water treatment [SDG_06_20] | 0.756822 |
| Population unable to keep home adequately warm by poverty status (sdg_07_60) | 0.657364 |
| Final energy consumption [SDG_07_11] | 0.777693 |
| Energy import dependency by products [SDG_07_50] | 0.408804 |
| Share of renewable energy in gross final energy consumption by sector [SDG_07_40] | 0.275125 |
| Primary energy consumption [SDG_07_10] | 0.824138 |
| Final energy consumption in households per capita (sdg_07_20) | 0.580934 |
| Energy productivity (sdg_07_30) | 0.252429 |
| Real GDP per capita [SDG_08_10] | 0.279134 |
| Young people neither in employment nor in education and training by sex (NEET) [SDG_08_20] | 0.573124 |
| Investment share of GDP by institutional sectors [SDG_08_11] | 0.558549 |
| Long-term unemployment rate by sex [SDG_08_40] | 0.769547 |
| Employment rate by sex [SDG_08_30] | 0.637201 |
| Gross domestic expenditure on R&D by sector [SDG_09_10] | 0.423527 |
| R&D personnel by sector [SDG_09_30] | 0.508979 |
| Share of buses and trains in inland passenger transport [SDG_09_50] | 0.56354 |
| Share of rail and inland waterways in inland freight transport [SDG_09_60] | 0.441033 |
| Air emission intensity from industry (sdg_09_70) | 0.924763 |
| Purchasing power adjusted GDP per capita [SDG_10_10] | 0.222821 |
| Income distribution [SDG_10_41] | 0.633794 |
| Adjusted gross disposable income of households per capita [SDG_10_20] | 0.498162 |
| Relative median at-risk-of-poverty gap [SDG_10_30] | 0.621447 |
| Income share of the bottom 40 % of the population (sdg_10_50) | 0.460494 |
| Asylum applications by state of procedure (sdg_10_60) | 0.884927 |
| Population living in households considering that they suffer from noise, by poverty status [SDG_11_20] | 0.58386 |
| Road traffic deaths, by type of roads (source: DG MOVE) [SDG_11_40] | 0.592593 |
| Recycling rate of municipal waste [SDG_11_60] | 0.505696 |
| Premature deaths due to exposure to fine particulate matter (PM2.5) (sdg_11_52) | 0.64994 |
| Circular material use rate [SDG_12_41] | 0.348898 |
| Raw material consumption - Tonnes per capita (RMC) (sdg_12_21) | 0.743335 |
| Consumption footprint – Per inhabitant - single weighted score (sdg_12_31) | 0.55275 |
| Generation of waste by hazardousness (sdg_12_51) | 0.733554 |
| Net greenhouse gas emissions (source: EEA) [SDG_13_10] | 0.611577 |
| Population covered by the Covenant of Mayors for Climate & Energy signatories (source: Covenant of Mayors) [SDG_13_60] NOT IN GOAL 13 ANYMORE | 0.472858 |
| Net greenhouse gas emissions of the Land use, Land use change and Forestry (LULUCF) sector - Tonnes per capita (sdg_13_21) | 0.479202 |
| Average CO2 emissions per km from new passenger cars (sdg_13_31) | 0.346864 |
| Green bond issuance by type of issuer (sdg_13_70) | 0.405362 |
| 14 10 Surface of the marine protected areas | 0.354039 |
| 14 40 COASTAL Bathing sites with excellent water quality by location | 0.73451 |
| 14 40 INLAND Bathing sites with excellent water quality by location | 0.698916 |
| 15 20 Surface of the terrestrial protected areas | 0.484165 |
| Population reporting occurrence of crime, violence or vandalism in their area by poverty status [SDG_16_20] | 0.62944 |
| Perceived independence of the justice system (source: DG COMM) [SDG_16_40] | 0.517413 |
| Population with confidence in EU institutions by institution (source: DG COMM) [SDG_16_60] | 0.52953 |
| Corruption Perceptions Index (sdg_16_50) | 0.450617 |
| Victims of trafficking in human beings by sex (sdg_16_70) | 0.796407 |
| Official development assistance as share of gross national income (source: DG INTPA, OECD) [SDG_17_10] | 0.389474 |
| High-speed internet coverage, by type of area (source: DG CNECT and Eurostat) [SDG_17_60] | 0.678516 |
| General government gross debt (sdg_17_40) | 0.694697 |
| Share of environmental taxes in total tax revenues (sdg_17_50) | 0.266496 |

Table S5. Sustainability scores of European countries in both baseline and alternative contexts (TOPSIS approach)

|  | **EWI** | **EWG** | **EWDG** |
| --- | --- | --- | --- |
| **Belgium** | 0.642 | 0.616 | 0.658 |
| **Bulgaria** | 0.531 | 0.556 | 0.495 |
| **Czechia** | 0.651 | 0.630 | 0.557 |
| **Denmark** | 0.691 | 0.647 | 0.649 |
| **Germany** | 0.612 | 0.673 | 0.623 |
| **Estonia** | 0.601 | 0.581 | 0.534 |
| **Ireland** | 0.640 | 0.575 | 0.545 |
| **Greece** | 0.522 | 0.554 | 0.532 |
| **Spain** | 0.583 | 0.596 | 0.548 |
| **France** | 0.602 | 0.624 | 0.585 |
| **Croatia** | 0.614 | 0.606 | 0.531 |
| **Italy** | 0.593 | 0.566 | 0.544 |
| **Cyprus** | 0.520 | 0.557 | 0.478 |
| **Latvia** | 0.600 | 0.571 | 0.531 |
| **Lithuania** | 0.614 | 0.591 | 0.567 |
| **Luxembourg** | 0.595 | 0.624 | 0.540 |
| **Hungary** | 0.607 | 0.594 | 0.598 |
| **Malta** | 0.567 | 0.513 | 0.484 |
| **Netherlands** | 0.657 | 0.657 | 0.621 |
| **Austria** | 0.613 | 0.634 | 0.568 |
| **Poland** | 0.614 | 0.630 | 0.540 |
| **Portugal** | 0.540 | 0.508 | 0.484 |
| **Romania** | 0.551 | 0.532 | 0.532 |
| **Slovenia** | 0.633 | 0.629 | 0.525 |
| **Slovakia** | 0.638 | 0.639 | 0.603 |
| **Finland** | 0.625 | 0.573 | 0.552 |
| **Sweden** | 0.695 | 0.641 | 0.664 |

Table S6. Ranking of European countries in both baseline and alternative contexts (TOPSIS approach)

|  | **EWI** | **EWG** | **EWDG** |
| --- | --- | --- | --- |
| **Belgium** | 5 | 12 | 2 |
| **Bulgaria** | 25 | 23 | 24 |
| **Czechia** | 4 | 7 | 11 |
| **Denmark** | 2 | 3 | 3 |
| **Germany** | 14 | 1 | 4 |
| **Estonia** | 17 | 17 | 18 |
| **Ireland** | 6 | 18 | 14 |
| **Greece** | 26 | 24 | 19 |
| **Spain** | 21 | 14 | 13 |
| **France** | 16 | 11 | 8 |
| **Croatia** | 12 | 13 | 21 |
| **Italy** | 20 | 21 | 15 |
| **Cyprus** | 27 | 22 | 27 |
| **Latvia** | 18 | 20 | 22 |
| **Lithuania** | 10 | 16 | 10 |
| **Luxembourg** | 19 | 10 | 16 |
| **Hungary** | 15 | 15 | 7 |
| **Malta** | 22 | 26 | 25 |
| **Netherlands** | 3 | 2 | 5 |
| **Austria** | 13 | 6 | 9 |
| **Poland** | 11 | 8 | 17 |
| **Portugal** | 24 | 27 | 26 |
| **Romania** | 23 | 25 | 20 |
| **Slovenia** | 8 | 9 | 23 |
| **Slovakia** | 7 | 5 | 6 |
| **Finland** | 9 | 19 | 12 |
| **Sweden** | 1 | 4 | 1 |

Table S7. Weight per criterion used in the sensitivity analysis.

| **Criterion** | **Baseline** | **Normal** | **Decreasing** | **Casual** |
| --- | --- | --- | --- | --- |
| People at risk of poverty or social exclusion (sdg_01_10) | 0.0132 | 0.0155 | 0.0499 | 0.0055 |
| Housing cost overburden rate by poverty status [SDG_01_50] | 0.0132 | 0.0147 | 0.0475 | 0.0087 |
| People at risk of income poverty after social transfers [SDG_01_20] | 0.0132 | 0.0126 | 0.0451 | 0.0134 |
| Severe material and social deprivation rate by age group and sex (sdg_01_31) | 0.0132 | 0.0166 | 0.0429 | 0.0231 |
| Persons living in households with very low work intensity, by age group (sdg_01_40) | 0.0132 | 0.0121 | 0.0408 | 0.0023 |
| In work at-risk-of-poverty rate (sdg_01_41) | 0.0132 | 0.0184 | 0.0389 | 0.0287 |
| Agricultural factor income per annual work unit (AWU) (source: Eurostat, DG AGRI) (sdg_02_20) | 0.0132 | 0.0133 | 0.0370 | 0.0113 |
| Area under organic farming [SDG_02_40] | 0.0132 | 0.0158 | 0.0352 | 0.0136 |
| Obesity rate by body mass index (BMI) (sdg_02_10) | 0.0132 | 0.0131 | 0.0334 | 0.0116 |
| Ammonia emissions from agriculture (source: EEA) [SDG_02_60] | 0.0132 | 0.0147 | 0.0318 | 0.0239 |
| Government support to agricultural research and development [SDG_02_30] - euro per inhabitant | 0.0132 | 0.0091 | 0.0303 | 0.0077 |
| Share of people with good or very good perceived health by sex [SDG_03_20] | 0.0132 | 0.0116 | 0.0288 | 0.0068 |
| Self-reported unmet need for medical examination and care by sex [SDG_03_60] | 0.0132 | 0.0093 | 0.0274 | 0.0037 |
| Healthy life years at birth by sex [SDG_03_11] | 0.0132 | 0.0166 | 0.0260 | 0.0023 |
| Consumption of antibiotics in the community and hospital sectors – defined daily doses (DDD) per day (sdg_03_70) | 0.0132 | 0.0182 | 0.0248 | 0.0033 |
| Tertiary educational attainment by sex [SDG_04_20] | 0.0132 | 0.0190 | 0.0236 | 0.0231 |
| Participation in early childhood education by sex (children aged 3 and over) [SDG_04_31] | 0.0132 | 0.0171 | 0.0224 | 0.0215 |
| Adult participation in learning by sex [SDG_04_60] | 0.0132 | 0.0080 | 0.0213 | 0.0250 |
| Early leavers from education and training by sex [SDG_04_10] | 0.0132 | 0.0176 | 0.0203 | 0.0029 |
| Low achieving 15-year-olds in reading, mathematics or science (sdg_04_40) | 0.0132 | 0.0104 | 0.0193 | 0.0226 |
| Share of individuals having at least basic digital skills, by sex (sdg_04_70) | 0.0132 | 0.0083 | 0.0184 | 0.0171 |
| Inactive population due to caring responsibilities by sex [SDG_05_40] | 0.0132 | 0.0096 | 0.0175 | 0.0050 |
| Positions held by women in senior management positions (source: EIGE) [SDG_05_60] | 0.0132 | 0.0103 | 0.0166 | 0.0228 |
| Seats held by women in national parliaments and governments (source: EIGE) [SDG_05_50] -- NAT PARL | 0.0132 | 0.0106 | 0.0158 | 0.0185 |
| Gender pay gap in unadjusted form [SDG_05_20] | 0.0132 | 0.0161 | 0.0150 | 0.0037 |
| Gender employment gap, by type of employment (sdg_05_30) | 0.0132 | 0.0084 | 0.0143 | 0.0254 |
| Population connected to at least secondary waste water treatment [SDG_06_20] | 0.0132 | 0.0111 | 0.0136 | 0.0154 |
| Population unable to keep home adequately warm by poverty status (sdg_07_60) | 0.0132 | 0.0157 | 0.0129 | 0.0215 |
| Final energy consumption [SDG_07_11] | 0.0132 | 0.0146 | 0.0123 | 0.0043 |
| Energy import dependency by products [SDG_07_50] | 0.0132 | 0.0126 | 0.0117 | 0.0251 |
| Share of renewable energy in gross final energy consumption by sector [SDG_07_40] | 0.0132 | 0.0154 | 0.0111 | 0.0085 |
| Primary energy consumption [SDG_07_10] | 0.0132 | 0.0126 | 0.0106 | 0.0037 |
| Final energy consumption in households per capita (sdg_07_20) | 0.0132 | 0.0142 | 0.0101 | 0.0164 |
| Energy productivity (sdg_07_30) | 0.0132 | 0.0110 | 0.0096 | 0.0154 |
| Real GDP per capita [SDG_08_10] | 0.0132 | 0.0181 | 0.0091 | 0.0008 |
| Young people neither in employment nor in education and training by sex (NEET) [SDG_08_20] | 0.0132 | 0.0164 | 0.0087 | 0.0284 |
| Investment share of GDP by institutional sectors [SDG_08_11] | 0.0132 | 0.0175 | 0.0082 | 0.0079 |
| Long-term unemployment rate by sex [SDG_08_40] | 0.0132 | 0.0168 | 0.0078 | 0.0281 |
| Employment rate by sex [SDG_08_30] | 0.0132 | 0.0087 | 0.0075 | 0.0270 |
| Gross domestic expenditure on R&D by sector [SDG_09_10] | 0.0132 | 0.0108 | 0.0071 | 0.0093 |
| R&D personnel by sector [SDG_09_30] | 0.0132 | 0.0136 | 0.0068 | 0.0016 |
| Share of buses and trains in inland passenger transport [SDG_09_50] | 0.0132 | 0.0073 | 0.0064 | 0.0092 |
| Share of rail and inland waterways in inland freight transport [SDG_09_60] | 0.0132 | 0.0044 | 0.0061 | 0.0099 |
| Air emission intensity from industry (sdg_09_70) | 0.0132 | 0.0122 | 0.0058 | 0.0020 |
| Purchasing power adjusted GDP per capita [SDG_10_10] | 0.0132 | 0.0118 | 0.0055 | 0.0019 |
| Income distribution [SDG_10_41] | 0.0132 | 0.0070 | 0.0053 | 0.0043 |
| Adjusted gross disposable income of households per capita [SDG_10_20] | 0.0132 | 0.0198 | 0.0050 | 0.0224 |
| Relative median at-risk-of-poverty gap [SDG_10_30] | 0.0132 | 0.0100 | 0.0048 | 0.0127 |
| Income share of the bottom 40 % of the population (sdg_10_50) | 0.0132 | 0.0132 | 0.0045 | 0.0073 |
| Asylum applications by state of procedure (sdg_10_60) | 0.0132 | 0.0111 | 0.0043 | 0.0187 |
| Population living in households considering that they suffer from noise, by poverty status [SDG_11_20] | 0.0132 | 0.0194 | 0.0041 | 0.0069 |
| Road traffic deaths, by type of roads (source: DG MOVE) [SDG_11_40] | 0.0132 | 0.0107 | 0.0039 | 0.0134 |
| Recycling rate of municipal waste [SDG_11_60] | 0.0132 | 0.0137 | 0.0037 | 0.0102 |
| Premature deaths due to exposure to fine particulate matter (PM2.5) (sdg_11_52) | 0.0132 | 0.0137 | 0.0035 | 0.0201 |
| Circular material use rate [SDG_12_41] | 0.0132 | 0.0143 | 0.0034 | 0.0216 |
| Raw material consumption - Tonnes per capita (RMC) (sdg_12_21) | 0.0132 | 0.0155 | 0.0032 | 0.0105 |
| Consumption footprint – Per inhabitant - single weighted score (sdg_12_31) | 0.0132 | 0.0133 | 0.0030 | 0.0032 |
| Generation of waste by hazardousness (sdg_12_51) | 0.0132 | 0.0095 | 0.0029 | 0.0191 |
| Net greenhouse gas emissions (source: EEA) [SDG_13_10] | 0.0132 | 0.0159 | 0.0027 | 0.0176 |
| Population covered by the Covenant of Mayors for Climate & Energy signatories (source: Covenant of Mayors) [SDG_13_60] NOT IN GOAL 13 ANYMORE - percentage | 0.0132 | 0.0186 | 0.0026 | 0.0127 |
| Net greenhouse gas emissions of the Land use, Land use change and Forestry (LULUCF) sector - Tonnes per capita (sdg_13_21) | 0.0132 | 0.0191 | 0.0025 | 0.0154 |
| Average CO2 emissions per km from new passenger cars (sdg_13_31) | 0.0132 | 0.0178 | 0.0024 | 0.0213 |
| Green bond issuance by type of issuer (sdg_13_70) | 0.0132 | 0.0132 | 0.0022 | 0.0118 |
| Population reporting occurrence of crime, violence or vandalism in their area by poverty status [SDG_16_20] | 0.0132 | 0.0148 | 0.0021 | 0.0030 |
| Perceived independence of the justice system (source: DG COMM) [SDG_16_40] | 0.0132 | 0.0109 | 0.0020 | 0.0058 |
| Population with confidence in EU institutions by institution (source: DG COMM) [SDG_16_60] | 0.0132 | 0.0089 | 0.0019 | 0.0272 |
| Corruption Perceptions Index (sdg_16_50) | 0.0132 | 0.0091 | 0.0018 | 0.0025 |
| Victims of trafficking in human beings by sex (sdg_16_70) | 0.0132 | 0.0106 | 0.0018 | 0.0057 |
| Official development assistance as share of gross national income (source: DG INTPA, OECD) [SDG_17_10] | 0.0132 | 0.0089 | 0.0017 | 0.0040 |
| High-speed internet coverage, by type of area (source: DG CNECT and Eurostat) [SDG_17_60] | 0.0132 | 0.0122 | 0.0016 | 0.0285 |
| General government gross debt (sdg_17_40) | 0.0132 | 0.0071 | 0.0015 | 0.0251 |
| Share of environmental taxes in total tax revenues (sdg_17_50) | 0.0132 | 0.0137 | 0.0014 | 0.0084 |
| 14 10 Surface of the marine protected areas | 0.0132 | 0.0144 | 0.0014 | 0.0283 |
| 14 40 COASTAL Bathing sites with excellent water quality by location | 0.0132 | 0.0115 | 0.0013 | 0.0064 |
| 14 40 INLAND Bathing sites with excellent water quality by location | 0.0132 | 0.0170 | 0.0012 | 0.0106 |
| 15 20 Surface of the terrestrial protected areas | 0.0132 | 0.0134 | 0.0012 | 0.0053 |
